# Supplementary material
Source: PubMed Central journal article supplement (PMC6401251)

1           **Ectopic lipid deposition mediates insulin resistance in adipose specific 11 $\beta$ -**  
2                           **Hydroxysteroid Dehydrogenase transgenic mice**

3  
4   **Supplementary Material**

5   **Supplemental Figure 1. Hepatic total diacylglycerol content presented by DAG species.**

6   Component diacylglycerol species from total diacylglycerols presented in Figure 2B. White bars:  
7   WT; Grey bars: HSD Tg; Hatched bars: HSD Tg + CRMP. Data are the mean  $\pm$  SEM of n = 7-8  
8   samples in each group. \* P < 0.05 HSD Tg vs WT; ‡ P < 0.05 HSD Tg + CRMP vs HSD TG; † P  
9   < 0.05 HSD Tg + CRMP vs WT.

10  
11   **Supplemental Figure 2. Akt phosphorylation immunoblot quantitation.** Quantitation of the  
12   individual components of Figure 3C. **A.** Densitometry of blots comparing WT with HSD Tg. **B.**  
13   Densitometry of blots comparing WT with HSD Tg + CRMP. Data are the mean  $\pm$  SEM of n = 6  
14   in each group.

Supplementary Figure 1.

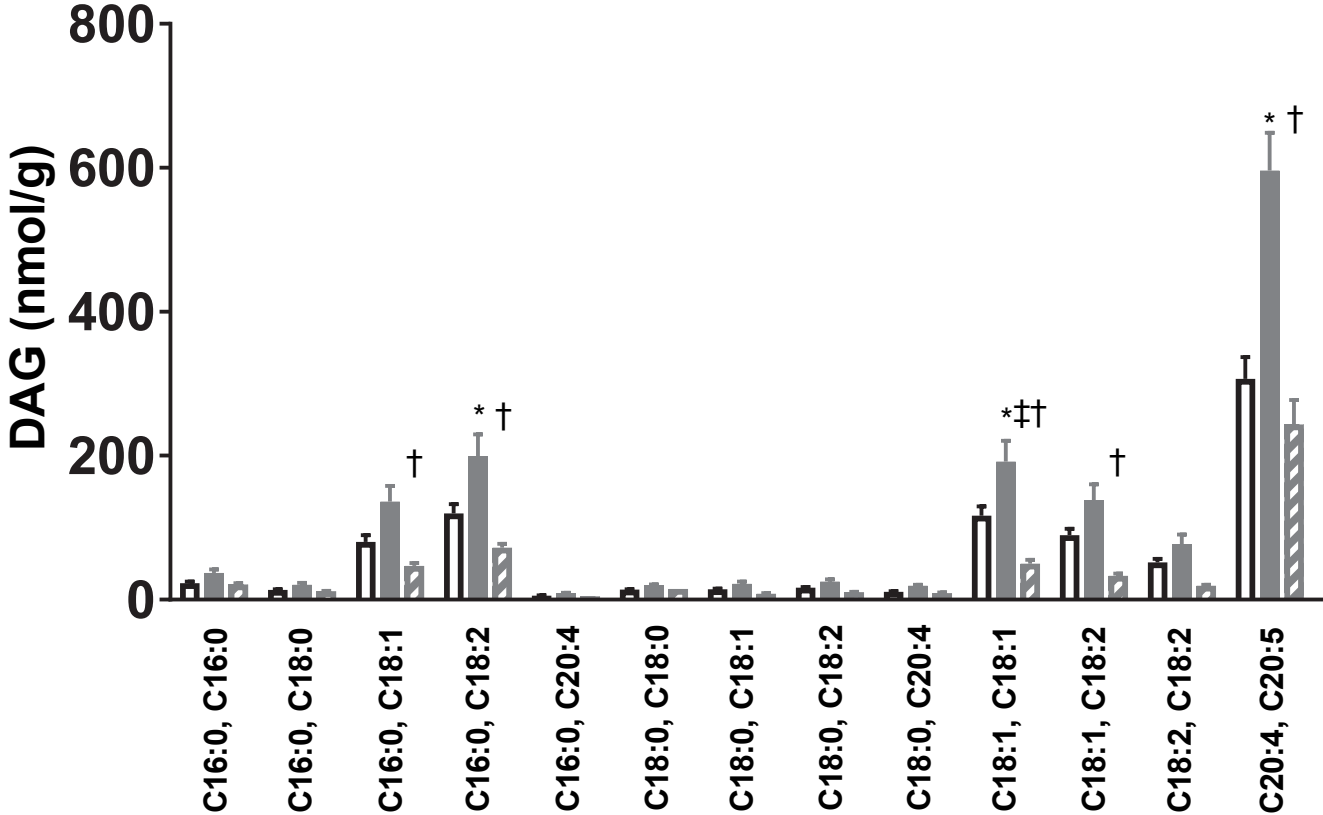

# Supplementary Figure 2.

## A. WT and HSD Transgenic

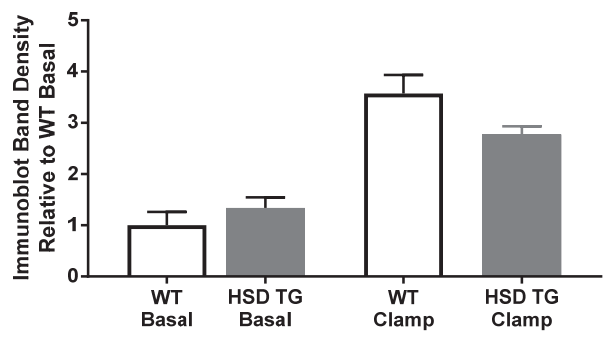

## B. WT and HSD Transgenic + CRMP

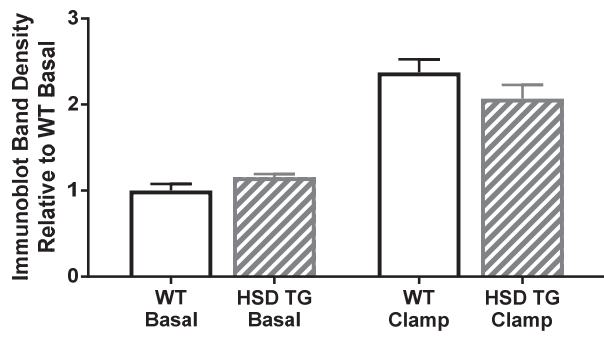

Supplement: NIHMS1517039-supplement-1.pdf [file NIHMS1517039-supplement-1.pdf]
